# Supplementary material for: Axl-mediated activation of TBK1 drives epithelial plasticity in pancreatic cancer
Source: JCI journal article supplement (doi:10.1172/jci.insight.126117), 2019-04-02
Supplement: sd1 [file 1]

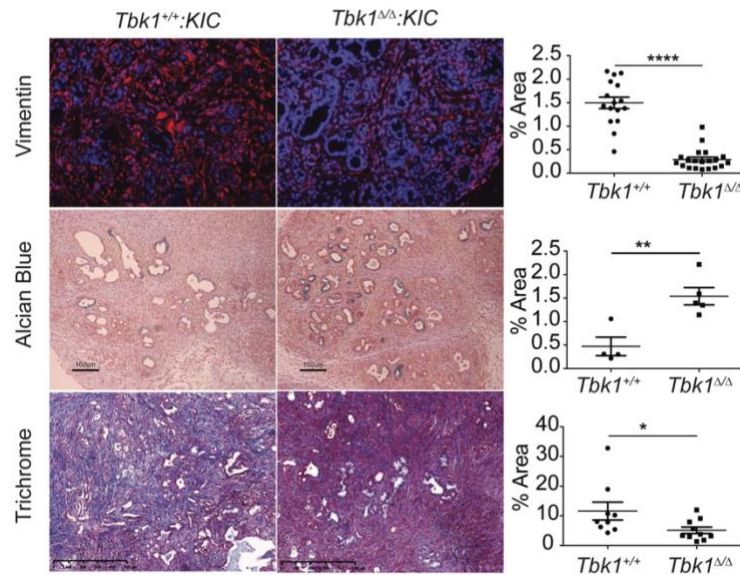

**Supplemental Figure 1. Tumors in *Tbk1*<sup>Δ/Δ</sup>: KIC mice display enhanced epithelial differentiation.** Representative images of vimentin, alcian blue, and trichrome stained tumors from 8-week-old *Tbk1*<sup>+/+</sup>: KIC and *Tbk1*<sup>Δ/Δ</sup>: KIC mice. Scale bars indicate 100μm for alcian blue images and 500μm for trichrome images; n ≥ 4 mice/group, 4 images/mouse.

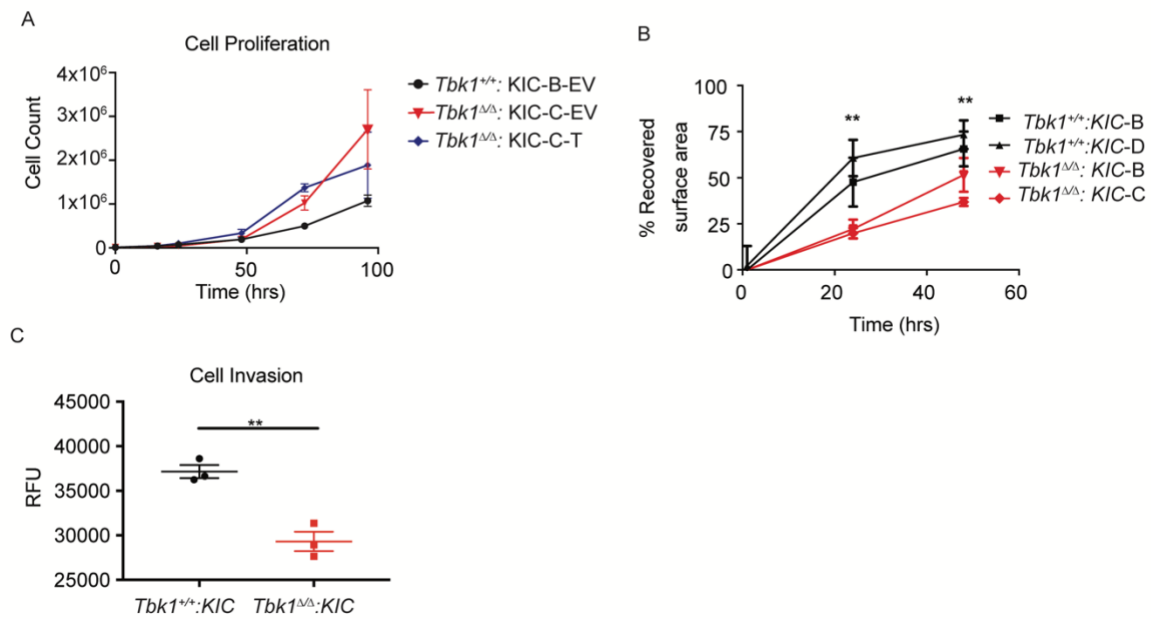

**Supplemental Figure 2. *Tbk1*<sup>Δ/Δ</sup>: KIC tumor cells are less migratory and invasive than *Tbk1*<sup>+/+</sup>: KIC cells.** **A)** Cell proliferation of *Tbk1*: KIC cell lines infected with EV or T. Cells were counted over 96 hours, n = 3 plates/cell line. The migratory capacity of cell lines derived from *Tbk1*: KIC tumors was investigated using scratch (**B**) and transwell migration (**C**) assays. **B)** Recovered surface area of *Tbk1*: KIC cell lines at 0, 24, and 48 hours post. **C)** Quantification (expressed as relative fluorescent units) of *Tbk1*: KIC cells after migration through ECM-coated transwell membranes 24 hours after plating in serum-free media. The lower chamber of the transwell were filled with 10% FBS containing media as the chemoattractant. Assays are representative of n > 3 repeats. Results are representative of mean ± SEM. Results are representative of mean ± SEM. Unpaired two-tailed *t* test, \**p* < 0.05, \*\**p* < 0.01.

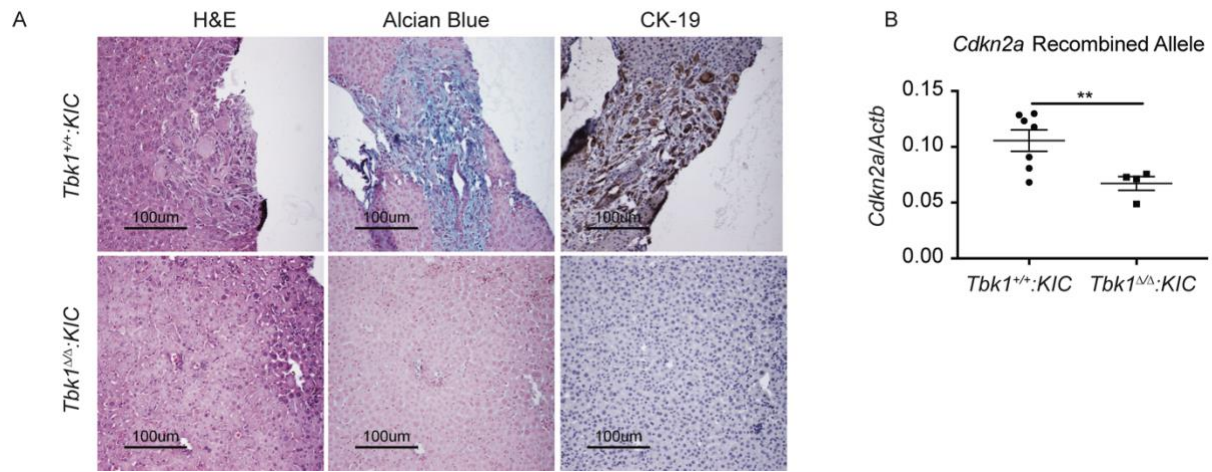

**Supplemental Figure 3. *Tbk1<sup>Δ/Δ</sup>: KIC* tumors are less metastatic than *Tbk1<sup>+/-</sup>: KIC* tumors.** **A)** Representative liver histology in mice from 8-week-old *Tbk1<sup>+/-</sup>: KIC* and *Tbk1<sup>Δ/Δ</sup>: KIC* mice, including H&E, alcian blue, and CK19 immunohistochemical staining. Scale bars indicate 100  $\mu$ m. **B)** Metastasis to the liver was quantified by qPCR for recombined *Cdkn2a* allele (n = 4-7 mice/group). Results are representative of mean  $\pm$  SEM. Unpaired two-tailed *t* test, \**p* < 0.05, \*\**p* < 0.01, \*\*\*\**p* < 0.0001.

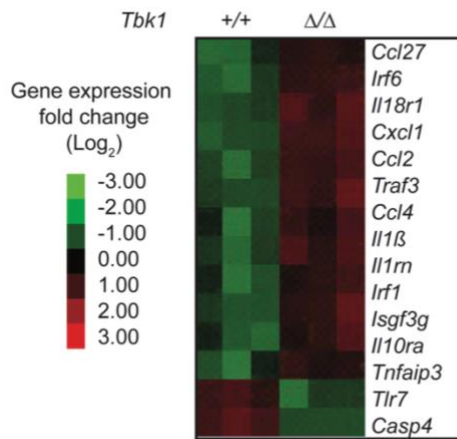

**Supplemental Figure 4. *Tbk1*<sup>Δ/Δ</sup>: KIC tumors contain higher pro-inflammatory gene expression than *Tbk1*<sup>+/+</sup>: KIC tumors.** Heatmap representing gene expression fold change (log<sub>2</sub>) of inflammatory genes from *Tbk1*<sup>Δ/Δ</sup>: KIC and *Tbk1*<sup>+/+</sup>: KIC tumors. Color key indicates gene expression fold change; n = 3 tumors/genotype, *p* < 0.05 for all genes between *Tbk1*<sup>Δ/Δ</sup>: KIC and *Tbk1*<sup>+/+</sup>: KIC tumors.

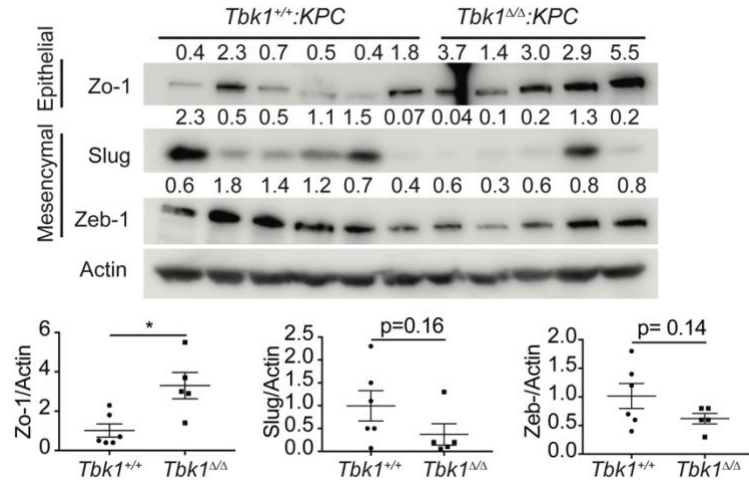

**Supplemental Figure 5. *Tbk1* promotes mesenchymal protein expression in KPC cell lines.** Protein lysates isolated from *Tbk1*<sup>+/+</sup>: KPC and *Tbk1*<sup>Δ/Δ</sup>: KPC cell lines were immunoblotted for indicated epithelial and mesenchymal markers. Actin was used as a loading control. Signal intensity of each sample was quantified and normalized to the mean *Tbk1*<sup>+/+</sup>: KPC signal. Results are representative of mean  $\pm$  SEM. Unpaired two-tailed *t* test, \**p* < 0.05.

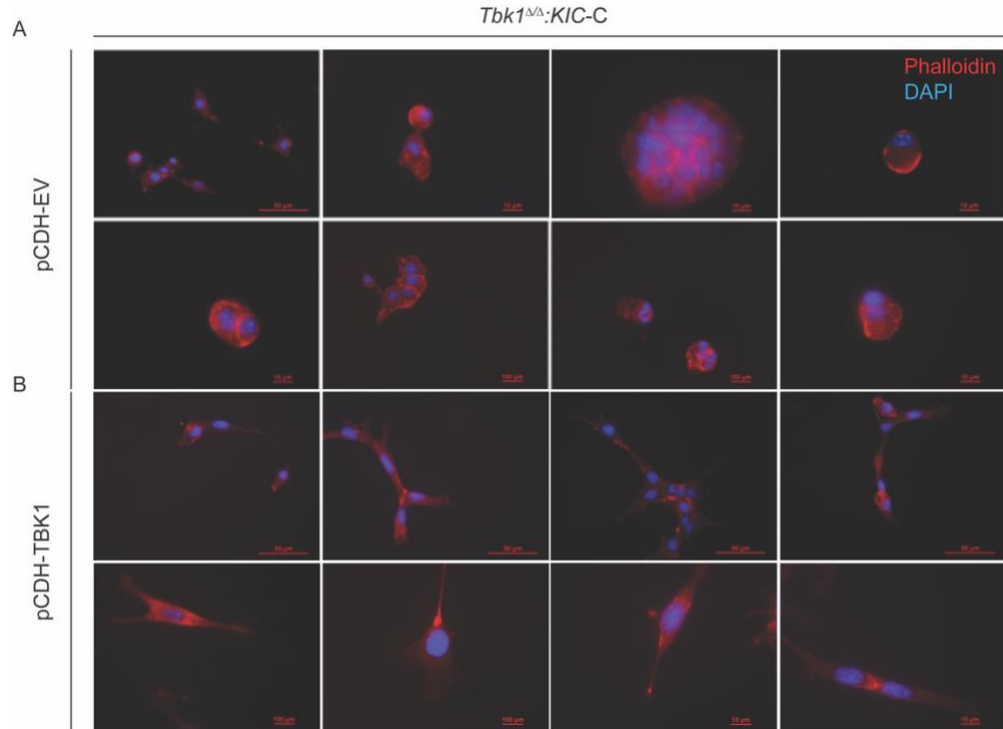

**Supplemental Figure 6. TBK1 re-expression drives a mesenchymal morphology in *Tbk1<sup>Δ/Δ</sup>: KIC* cell lines.** Representative images of *Tbk1<sup>Δ/Δ</sup>: KIC-C* cells infected with **(A)** lentiviral empty vector (EV) or **(B)** full-length TBK1 (T) plated on a mixed layer of collagen and Matrigel. Cells are fixed and nuclei are labeled with DAPI (blue) and F-actin is labeled with phalloidin (red).

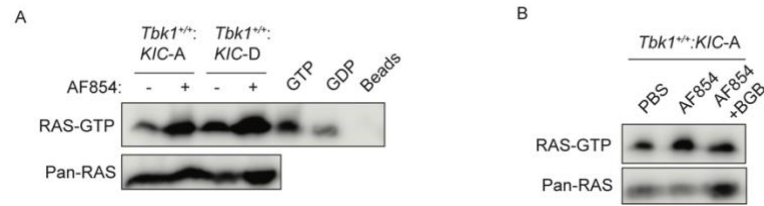

**Supplemental Figure 7. Axl-activating antibody AF854 stimulates Ras activity.**

**A)** Protein lysates from *Tbk1*<sup>+/+</sup>: KIC-A and *Tbk1*<sup>+/+</sup>: KIC-D cells treated with PBS or AF854 (6nM) for 30 min were assayed for active Ras and Pan-Ras. GTP and GDP protein loading were used as positive and negative controls, respectively. **B)** Protein lysates isolated from *Tbk1*<sup>+/+</sup>: KIC-A cells treated with either PBS, AF854 (6nM), or AF854 (6nM) + BGB324 (BGB, 2  $\mu$ M) for 30 min were assayed for active Ras and Pan-Ras.
